# Supplementary material
Source: publisher figshare collection journal article supplement (https://karger.figshare.com/ndownloader/files/25194887)
Supplement: Supplementary file 1 [file 25194887]

Online Supplemental Tab. 2.1. Eingeschlossene Angststörungs-Apps und deren Ergebnisse.

| **Name der App** | **Erstautor, Jahr** | **Beschreibung der App** | **Studiendesign**  **&**  **Erhebungszeitpunkte** | **Stichprobe**  **&**  **Intervention** | **Compliance (Abschluss der Behandlung)** | **Qualitätsbewertung (Schwächen)1** |
| --- | --- | --- | --- | --- | --- | --- |
| **Interventionsbasierte Apps – mit Therapeutenkontakt** | | | | | | |
| **Mobiletype**  (**Mobile** **T**racking **Y**oung **P**eople’s **E**xperiences) | Reid, 2011 | Rational: KVT  Self-Monitoring App bei Ängsten und depressiven Symptomen, Erfassung des Verhaltens | **RCT**  Erhebungszeitpunkte: 4 (Baseline, bei Besprechung der Ergebnisse mit dem Hausarzt/ Post-Test, nach 6 Wochen, nach 6 Monaten/ Follow-up) | N=118 undifferenzierte Diagnosen (depressive bzw. Angstsymptome) (K10>16)  IG (App-Nutzung): N=69  KG (Nutzung einer verkürzten Version der App ohne die Module zu psychischer Gesundheit; attention control intervention): N=49  Alter (M, SD): IG = 18,5 (3,2) Jahre; KG = 17,4 (3,2) Jahre | 25% | (3), (4), (5), (10) |
| Kauer, 2012 |
| Reid, 2013 |
| **Ångesthjälpen**  (The Anxiety  Help) | Ivanova, 2016 | Rational: achtsamkeitsorientiertes Therapiemanual Ångesthjälpen (The Anxiety Help, Ly, Asplund et al., 2014; Ly et al., 2015)  Features:  In Anlehnung an das Übungsbuch, bestehend aus 8 Modulen | **RCT**  Erhebungszeitpunkte: 5 (Baseline, nach 27 Tagen, nach 48 Tagen, Ende der Intervention/ 10 Wochen, nach 12 Monaten/ Follow-up) | N =152 Angststörung (N=113 soziale Phobie; N=39 Panikstörung) (LSAS-SR≥30 / PDSS-SR≥8; PHQ-9<20; SCID-I)  IG I (App plus Internettherapie mit Therapeutenbegleitung): N=50  IG II (App plus Internettherapie ohne Therapeutenbegleitung): N=51  WL: N=51  Alter (M, SD): 35,29 (10,98) Jahre | Keine Angaben | (3) |
| **Unbekannt** | Stolz, 2018 | Rational: KVT  Features:   - Motivationsaufbau durch Setzung von Zielen - Psychoedukation - Kognitive Umstrukturierung - Aufmerksamkeitstraining - Verhaltensexperimente - Zusammenfassung und Wiederholung - Gesunder Lebensstil und Problemlösen - Rückfallprophylaxe | **RCT**  Erhebungszeitpunkte: 3 (Baseline, Ende der Intervention/ 12 Wochen, Follow-up/ 3 Monate) | N=150 soziale Phobie (SPS > 22 oder SIAS > 33; SCID-I)  IG I (App): N=60  IG II (Selbsthilfeprogramm): N=60  WL: N=30  Alter (M, SD): IG I = 34,6 (12,0); IG II = 34,7 (9,9); WL = 35,2 (12,1) | IG I = 23,3%  IG II = 30% | (3) |
| **Intellicare Suite**‡ | Mohr, 2017 | Rational: KVT, Skills-Training  14 unterschiedliche Apps (13 Apps zur Intervention bei Ängsten und Depressionen: „Worry Knot“, „Boost Me“, „Day to Day“, „Social Force”, “My Mantra”, “Aspire”, “Daily Feats”, “Thought Challenger”, “iCope”, “Purple Chill”, “Move Me” und “Slumber Time”; 1 App „Hub“ zur Koordination der anderen Apps) | **Prä-Post-Studie, Nutzungsverhalten**  Erhebungszeitpunkte: 3 (Baseline, nach 4 Wochen, nach 8 Wochen) | N=105 undifferenzierte Diagnosen (depressive bzw. Angstsymptome) (GAD-7≥8 oder PHQ-9 ≥10)  Alter (Range): 27-50 Jahre | 6% | (1), (2), (3), (8), (10) |
| Lattie, 2016 | **Useranalyse** | N = 5210 User der App (undifferenzierte Diagnosen) | - | (1), (2), (3), (4), (5), (6), (7), (8), (9), (10) |
| Cheung, 2018 | **Useranalyse** | N= 4561 User der App (undifferenzierte Diagnosen)  User der „Hub“-App: N= 1514  Keine Nutzung der „Hub“-App: N =3047 | - |
| **ACT Daily** | Levin, 2017 | Rational: ACT  Anwendung von ACT-Skills und speziellen Skills zur Verbesserung der psychologischen Flexibilität  Aufbau:  1. Bibliothek bestehend aus 28 ACT-Skills  2. Check-in-System zum Monitoring von Gefühlen  3. Vorschlag eines geeigneten Skill anhand der eingegebenen Gefühle | **Prä-Post-Studie, Durchführbarkeit**  Erhebungszeitpunkte: 2 (Baseline, nach 2 Wochen/ Ende der Intervention) | N=14 undifferenzierte Diagnosen (Depression und Angst)  Alter (M, SD): 29 (11,55) Jahre | 7,14% | (1), (2), (3), (5), (7), (8), (9), (10) |
| **PsychAssist** | Clough, 2015 | Rational: KVT  Bestehend aus 6 Bausteinen: „Behaviour“, „Thinking and Feeling“, „Relaxation and Awareness”, “Notes from the Therapist”, “Reflection”, “My Planner” | **Akzeptanz**  Erhebungszeitpunkte: 1 (nach einem Jahr) | N=6 (Therapeuten) | 0% | (1), (2), (3), (4), (5), (6), (7), (8), (9), (10) |
| **TODAY!** | Fleming, 2017 | Rational: KVT  Spezielle 10-wöchige Intervention für Männer, die einer sexuellen Minderheit angehören mit zusätzlichen wöchentlichen, therapeutischen Kontakten via Email, Telefon oder SMS | **Durchführbarkeit**  Erhebungszeitpunkte**:** 1 (nach Interaktion mit der App) | N=9 depressive oder Angstsymptome (PHQ-4 ≥3)  Alter (M, SD): 19 (0,71) Jahre | 0% | (1), (2), (3), (4), (5), (6), (7), (8), (9), (10) |
| **Interventionsbasierte Apps – ohne Therapeutenkontakt** | | | | | | |
| **Challenger** | Boettcher, 2018 | Rational: KVT, spielifizierte Prinzipien  Bewältigung kleiner, individuell angepasster Übungen, genannt „Challenges“ (z.B. Exposition, Verhaltensexperimente) im Alltag. Spieleartige Struktur mit Avatar. | **RCT**  Erhebungszeitpunkte:7(Baseline, nach 3 Wochen, nach 7 Wochen/ Ende der ersten Behandlungsperiode, nach 10 Wochen, nach 14 Wochen/ Ende der zweiten Behandlungsperiode, nach 4 Monaten/ Follow-up, nach 12 Monaten/ Follow-up) | N=209 soziale Phobie (MINI/ DSM-5, LSAS-SR ≥ 30)  IG I (App plus Selbsthilfeprogramm; parallele Behandlung): N=70  IG II (Erst Selbsthilfeprogramm, dann App; sequenzielle Behandlung): N=70  WL: N=69  Alter (M, SD): 35,40 (12,25) Jahre | parallele Behandlung = 78,57%  sequenzielle Behandlung=47,14% | (3), (4), NA: (7) |
| **myCompass** | Proudfoot, 2013 | Rational: KVT, interpersonelle Therapie, Problem-Solving Therapy, positive Psychologie  Ziel: Behandlung von leichter bis mittelgradiger Depression, Ängsten und Stress. Bestehend aus App und Internet-Modul.  Internet-Modul:  12 Skills fokussierte Module | **RCT**  Erhebungszeitpunkte: 3 (Baseline, nach 7 Wochen/ Ende der Intervention, nach 3 Monaten/ Follow-up) | N = 720 undifferenzierte Diagnosen (leichte bis mittelgradige Depression, Ängste oder Stress)  (DASS= 27-63)  IG (App-Nutzung): N=242  KG (Psychoedukation mittels Computer/ SMS; attention control intervention): N= 248  WL: N=230  Alter (M): 38,9 Jahre | 45,5% | (3), (4), (5), NA: (7), (10) |
| Clarke, 2014 | 45,5% |
| Whitton, 2015 | N=242 (IG aus Proudfoot, 2013) | 45,5% |
| Clarke, 2016 | N=242 (IG aus Proudfoot, 2013) | 45,5% |
| **Stress Free**‡ | Christoforou, 2017 | Rational: KVT  Vermittlung von Entspannungstechniken und grundlegender KVT Fertigkeiten mit Hilfe eines virtuellen Therapeuten. Spielebasierende Elemente zum Umgang mit akuter Angst | **RCT, Akzeptanz**  Erhebungszeitpunkte: 3 (Baseline, nach 6 Wochen, nach 12 Wochen/ Ende der Intervention) | N=170 Agoraphobie (Bevölkerungsstichprobe; Diagnose beruht auf Selbstauskunft der Teilnehmer)  App I (Stress Free): N=84  App II (Agoraphobie Free): N=86  Alter (M, SD): 40,23 (12,21) Jahre | 46% | (2), (3), (4), (5), NA: (7), (10) |
| **Woebot**‡ | Fitzpatrick, 2017 | Rational: KVT  Automatisierter Gesprächspartner via Instant Messenger App. Kurze, tägliche Unterhaltungen und Self-Monitoring von Stimmung. App frägt User nach aktuellen Kontextinformationen/ Stimmung und antwortet User auf empathische Art. Anschließend erfolgt Präsentation von Videos oder „Wort-Spielen“ zur kognitiven Umstrukturierung | **RCT,**  **Durchführbarkeit, Akzeptanz**  Erhebungszeitpunkte: 2 (Baseline, nach 2 Wochen/ Ende der Intervention) | N=70 (undifferenzierte Diagnosen)  IG (App): N=34  KG (Informationen über Depressionen/ e-Book): N=36  Alter (M, SD): 22,2 (2,33) Jahre | 17% | (2), (3), (4), (5), NA: (7), (10) |

†auf Deutsch verfügbar;‡in deutschen App-Stores verfügbar

1(1) Vorliegen einer unkontrollierten Studie, (2) Keine Follow-up-Daten, (3) Ausschließliches Vorliegen von Selbstbeurteilungsinstrumenten als Ergebnismessung, (4) Keine Angaben bzgl. ergänzender, weiterer psychotherapeutischen Interventionen, (5) Keine Angaben bzgl. Psychopharmakotherapie, (6) Keine Analyse der Adhärenz der Patienten oder keine Qualitätskontrollen der Behandlung bzw. keine Angaben hierzu, (7) Keine Angaben über die Ausbildung der Therapeuten, (8) Ausschließliches Vorliegen einer Warteliste oder keine Vergleichsstichprobe, (9) Kleine Stichprobengröße (N < 50), (10) Keine Erhebung von DSM- und/ oder ICD-Kriterien.

Online Supplemental Tab. 2.2. Eingeschlossene Angststörungs-Apps und deren Effektstärken.

| **App** | **RCT** | **Erstautor, Jahr** | **Fragebogen** | **Effektstärke:**  **zwischen Gruppen post**  (Cohen’s d + 95% KI) | **Effektstärke:**  **zwischen Gruppen Katamnese**  (Cohen’s d + 95% KI) |
| --- | --- | --- | --- | --- | --- |
| **Interventionsbasierte Apps – ohne Therapeutenkontakt** | | | | |  |
| Mobiletype | x | Reid, 2011 | DASS-21  Angst-Subskala | IG + KG = 1,30; KI [0,82; 1,78] | IG + KG = 0,06; KI [-0,37; 0,50] |
|
| Ångesthjälpen | x | Ivanova, 2016 | GAD-7 | IG I + IG II = -0,23; KI [-0,67; 0,20] | IG I + IG II = -0,30; KI [-0,77; 0,17] |
| IG I + WL = -0,52; KI [-0,94; -0,09] |
| IG II + WL = -0,28; KI [-0,95; -0,08] |
| Unbekannt | x | Stolz, 2018 | Zusammengesetzt aus: SIAS, SPS, LSAS | IG I + IG II = -0,12; KI [-0,53; 0,30] | IG I + IG II = -0,08; KI [-0,54; 0,38] |
| IG II + WL= -0,81; KI [-1,33; -0,29] |
| IG I + WL = -0,98; KI [-1,52; -0,45] |
| **Interventionsbasierte Apps – ohne Therapeutenkontakt** | | | | | |
| Challenger | x | Boettcher, 2018 | LSAS-SR | IG I + IG II = -0,01; KI [-0,36; 0,34] | IG I + IG II = 0,08; KI [-0,28; 0,43] (4-Monate) |
|
| myCompass | x | Proudfoot, 2013 | DASS-21  Angst-Subskala | IG + KG = -0,36; KI [-0,59; -0,14] | IG + KG = -0,09; KI [-0,34; 0,16] |
| KG + WL = -0,06; KI [-0,26; 0,14] |
| IG + WL = -0,44; KI [-0,66; -0,21] |
| Stress Free | x | Christoforou, 2017 | PAS | App I + App II = 0,02; KI [-0,31; 0,35] | - |
|
| Woebot | x | Fitzpatrick, 2017 | GAD-7 | IG + KG = 0,15; KI [-0,38; 0,68] | - |
|

KVT = Kognitive Verhaltenstherapie; IG = Interventionsgruppe; KG = Kontrollgruppe; K10 = Kessler Psychological Distress Scale [Andrews und Slade, 2001]; DASS = Depression Anxiety Stress Scales [Lovibond und Lovibond, 1995]; M = Mittelwert; SD = Standardabweichung; LSAS-SR=Liebowitz Social Anxiety Scale-Self Rated [Liebowitz, 1987]; PDSS-SR = Panic Disorder Severity Scale-Self Report [Shear et al., 2001]; PHQ = Patient Health Questionnaire [Kroenke et al., 2001]; SCID = Structured Clinical Interview [First et al., 1996]; WL = Warteliste; SPS = Social Phobia Scale [Stangier et al., 1999]; SIAS = Social Interaction Anxiety Scale [Stangier et al., 1999]; GAD-7 = Generalized Anxiety Disorder Scale [Spitzer et al., 2006]; ACT = Akzeptanz- und Commitmenttherapie; MINI = Mini International Neuropsychiatric Interview [Sheehan et al., 1998]; PAS = Panic and Agoraphobia Scale [Bandelow, 1995]; NA = not available; RCT = Randomisiert-kontrollierte Studie; KI = Konfidenzintervall.

**Literatur**

1. Andrews G, Slade T. Interpreting scores on the Kessler psychological distress scale (K10). Aust N Z J Public Health. 2001;25(6):494-97.

2. Bandelow B. Assessing the efficacy of treatments for panic disorder and agoraphobia: II. The Panic and Agoraphobia Scale. Int Clin Psychopharmacol. 1995.

3. Boettcher J, Magnusson K, Marklund A, Berglund E, Blomdahl R, Braun U, et al. Adding a smartphone app to internet-based self-help for social anxiety: A randomized controlled trial. Computers in human behavior. 2018;87:98-108.

4. Cheung K, Ling W, Karr CJ, Weingardt K, Schueller SM, Mohr DC. Evaluation of a recommender app for apps for the treatment of depression and anxiety: an analysis of longitudinal user engagement. J Am Med Inform Assoc. 2018 Aug 1;25(8):955-62.

5. Christoforou M, Saez Fonseca JA, Tsakanikos E. Two Novel Cognitive Behavioral Therapy-Based Mobile Apps for Agoraphobia: Randomized Controlled Trial. J Med Internet Res. 2017 Nov 24;19(11):e398.

6. Clarke J, Proudfoot J, Birch MR, Whitton AE, Parker G, Manicavasagar V, et al. Effects of mental health self-efficacy on outcomes of a mobile phone and web intervention for mild-to-moderate depression, anxiety and stress: secondary analysis of a randomised controlled trial. BMC Psychiatry. 2014 Sep 26;14:272.

7. Clarke J, Proudfoot J, Whitton A, Birch MR, Boyd M, Parker G, et al. Therapeutic Alliance With a Fully Automated Mobile Phone and Web-Based Intervention: Secondary Analysis of a Randomized Controlled Trial. JMIR Ment Health. 2016 Feb 25;3(1):e10.

8. Clough BA, Casey LM. Therapy on the move: The development of a therapeutic smartphone application. International Journal of Cyber Behavior, Psychology and Learning (IJCBPL). 2015;5(1):33-41.

9. First MB, Spitzer RL, Gibbon M, Williams JBW. Structured Clinical Interview for DSM-IV Axis I Disorders, Clinician Version (SCID-CV). Washington, D.C.: American Psychiatric Press, Inc.; 1996.

10. Fitzpatrick KK, Darcy A, Vierhile M. Delivering Cognitive Behavior Therapy to Young Adults With Symptoms of Depression and Anxiety Using a Fully Automated Conversational Agent (Woebot): A Randomized Controlled Trial. JMIR Ment Health. 2017 Jun 6;4(2):e19.

11. Fleming JB, Hill YN, Burns MN. Usability of a Culturally Informed mHealth Intervention for Symptoms of Anxiety and Depression: Feedback From Young Sexual Minority Men. JMIR Hum Factors. 2017 Aug 25;4(3):e22.

12. Ivanova E, Lindner P, Ly KH, Dahlin M, Vernmark K, Andersson G, et al. Guided and unguided Acceptance and Commitment Therapy for social anxiety disorder and/or panic disorder provided via the Internet and a smartphone application: A randomized controlled trial. J Anxiety Disord. 2016 Dec;44:27-35.

13. Kroenke K, Spitzer R, Williams J. The PHQ-9. Validity of a brief depression severity measure. J Gen Intern Med. 2001;16:606 - 13.

14. Lattie EG, Schueller SM, Sargent E, Stiles-Shields C, Tomasino KN, Corden ME, et al. Uptake and Usage of IntelliCare: A Publicly Available Suite of Mental Health and Well-Being Apps. Internet Interv. 2016 May;4(2):152-58.

15. Levin ME, Haeger J, Pierce B, Cruz RA. Evaluating an Adjunctive Mobile App to Enhance Psychological Flexibility in Acceptance and Commitment Therapy. Behav Modif. 2017 Nov;41(6):846-67.

16. Liebowitz MR. Social phobia. Mod Probl Pharmacopsychiatry. 1987;22:141-73.

17. Lovibond PF, Lovibond SH. The structure of negative emotional states: comparison of the Depression Anxiety Stress Scales (DASS) with the Beck Depression and Anxiety Inventories. Behav Res Ther. 1995 Mar;33(3):335-43.

18. Mohr DC, Tomasino KN, Lattie EG, Palac HL, Kwasny MJ, Weingardt K, et al. IntelliCare: An Eclectic, Skills-Based App Suite for the Treatment of Depression and Anxiety. J Med Internet Res. 2017 Jan 5;19(1):e10.

19. Proudfoot J, Clarke J, Birch MR, Whitton AE, Parker G, Manicavasagar V, et al. Impact of a mobile phone and web program on symptom and functional outcomes for people with mild-to-moderate depression, anxiety and stress: a randomised controlled trial. BMC Psychiatry. 2013 Nov 18;13:312.

20. Reid SC, Kauer SD, Hearps SJ, Crooke AH, Khor AS, Sanci LA, et al. A mobile phone application for the assessment and management of youth mental health problems in primary care: a randomised controlled trial. BMC Fam Pract. 2011 Nov 29;12:131.

21. Shear MK, Rucci P, Williams J, Frank E, Grochocinski V, Vander Bilt J, et al. Reliability and validity of the Panic Disorder Severity Scale: replication and extension. J Psychiatr Res. 2001 Sep-Oct;35(5):293-6.

22. Sheehan DV, Lecrubier Y, Sheehan KH, Amorim P, Janavs J, Weiller E, et al. The Mini-International Neuropsychiatric Interview (M.I.N.I.): the development and validation of a structured diagnostic psychiatric interview for DSM-IV and ICD-10. J Clin Psychiatry. 1998;59 Suppl 20:22-33;quiz 34-57.

23. Spitzer RL, Kroenke K, Williams JB, Lowe B. A brief measure for assessing generalized anxiety disorder: the GAD-7. Arch Intern Med. 2006 May 22;166(10):1092-7.

24. Stangier U, Heidenreich T, Berardi A, Golbs U, Hoyer J. Assessment of social phobia by the social interaction anxiety scale and the social phobia scale. Zeitschrift Fur Klinische Psychologie-Forschung Und Praxis. 1999;28(1):28-36.

25. Stolz T, Schulz A, Krieger T, Vincent A, Urech A, Moser C, et al. A mobile app for social anxiety disorder: A three-arm randomized controlled trial comparing mobile and PC-based guided self-help interventions. J Consult Clin Psychol. 2018 Jun;86(6):493-504.

26. Whitton AE, Proudfoot J, Clarke J, Birch MR, Parker G, Manicavasagar V, et al. Breaking Open the Black Box: Isolating the Most Potent Features of a Web and Mobile Phone-Based Intervention for Depression, Anxiety, and Stress. JMIR Ment Health. 2015 Jan-Mar;2(1):e3.
